# Supplementary material for: High performance amorphous ZnMgO/carbon nanotube composite thin-film transistors with a tunable threshold voltage
Source: Royal Society of Chemistry journal article supplement (doi:10.1039/c3nr34222k), 2013-01-01
Supplement: c3nr34222k.pdf [file c3nr34222k.pdf]

# High Performance Amorphous ZnMgO/Carbon Nanotubes Composite Thin-Film Transistors with Tunable Threshold

## Voltage

Xingqiang Liu<sup>a</sup>, Wei Liu<sup>a</sup>, Xiangheng Xiao<sup>a</sup>, Chunlan Wang<sup>a</sup>, Zhiyong Fan<sup>b</sup>, Yongquan Qu<sup>c</sup>, Bo Cai<sup>a</sup>, Shishang Guo<sup>a</sup>, Jinchai Li<sup>a</sup>, Changzhong Jiang<sup>a</sup>, Lei Liao<sup>a,\*</sup>

<sup>a</sup>Department of Physics and Key Laboratory of Artificial Micro- and Nano-structures of Ministry of Education, Wuhan University, Wuhan 430072, China. E-mail: [liaolei@whu.edu.cn](mailto:liaolei@whu.edu.cn)

<sup>b</sup>Department of Electronic & Computer Engineering, Hong Kong University of Science & Technology, Hong Kong SAR, China.

<sup>c</sup>Center for Applied Chemical Research, Frontier Institute of Science and Technology, Xi'an Jiaotong University, Xi'an, 710049, China.

RECEIVED DATE ( )

\*To whom correspondence should be addressed. E-mail: [liaolei@whu.edu.cn](mailto:liaolei@whu.edu.cn)

## Supplementary Information

SI 1. Method of Preparing a-ZMO/SWNTs Composite Thin Film.

SI 2. Characterization of the Single Wall Carbon Nanotubes.

### SI 1. Method of Preparing a-ZMO/SWNTs Composite Thin Film

Mg(NO<sub>3</sub>)<sub>2</sub> and ZnAc·2H<sub>2</sub>O (99%) were dissolved in a mixture solution of ethanolamine and ethanolamine/2-methoxyethanol with volume ratio of 0.92:100. To prepare a-ZMO based thin films, the desired amount of Mg precursor was used while the total concentration of metal ions is maintained at 0.03 M. After 2 h vigorous stirring, the stable transparent solutions were formed. Finally, the uniform dispersed SWNTs solution was added into these solutions with the default weight concentrations. The metal oxide/SWNTs thin films were formed by spin-coating

method at the speed of 3000 rpm for 60 s on 100 nm SiO<sub>2</sub> coated *p*<sup>+</sup>-Si substrates. Subsequently, the spin-coated films were prebaked on the hotplate at 150 °C for 10 min to remove the organic solvent. The desired thickness of the a-ZMO/SWNTs was achieved through multiple coating processes. Finally, the as-prepared thin films were annealed on the hot plate at 350 °C for 40 min under ambient condition.

## SI 2. Characterization of the Single Wall Carbon Nanotubes

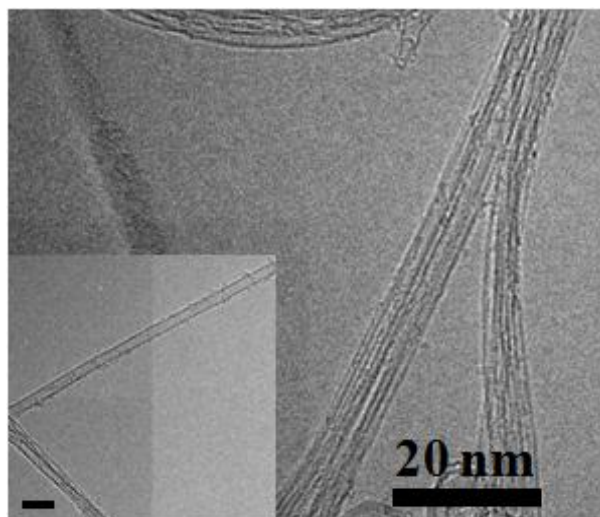

**Figure S1.** The transmission electron microscope (TEM) images of the SWNTs used in this work. The inset is the high-resolution TEM image, the scale bar is 5 nm, identifying their single-walled nanostructures.
